# Supplementary material for: Progranulin functions as a cathepsin D chaperone to stimulate axonal outgrowth in vivo
Source: PubMed Central journal article supplement — Hum Mol Genet. 2017 Apr 26;26(15):2850–63. doi: 10.1093/hmg/ddx162 (PMC5886064; doi:10.1093/hmg/ddx162), 2017-04-26
Supplement: ddx162_supp.pdf [file ddx162_supp.pdf]

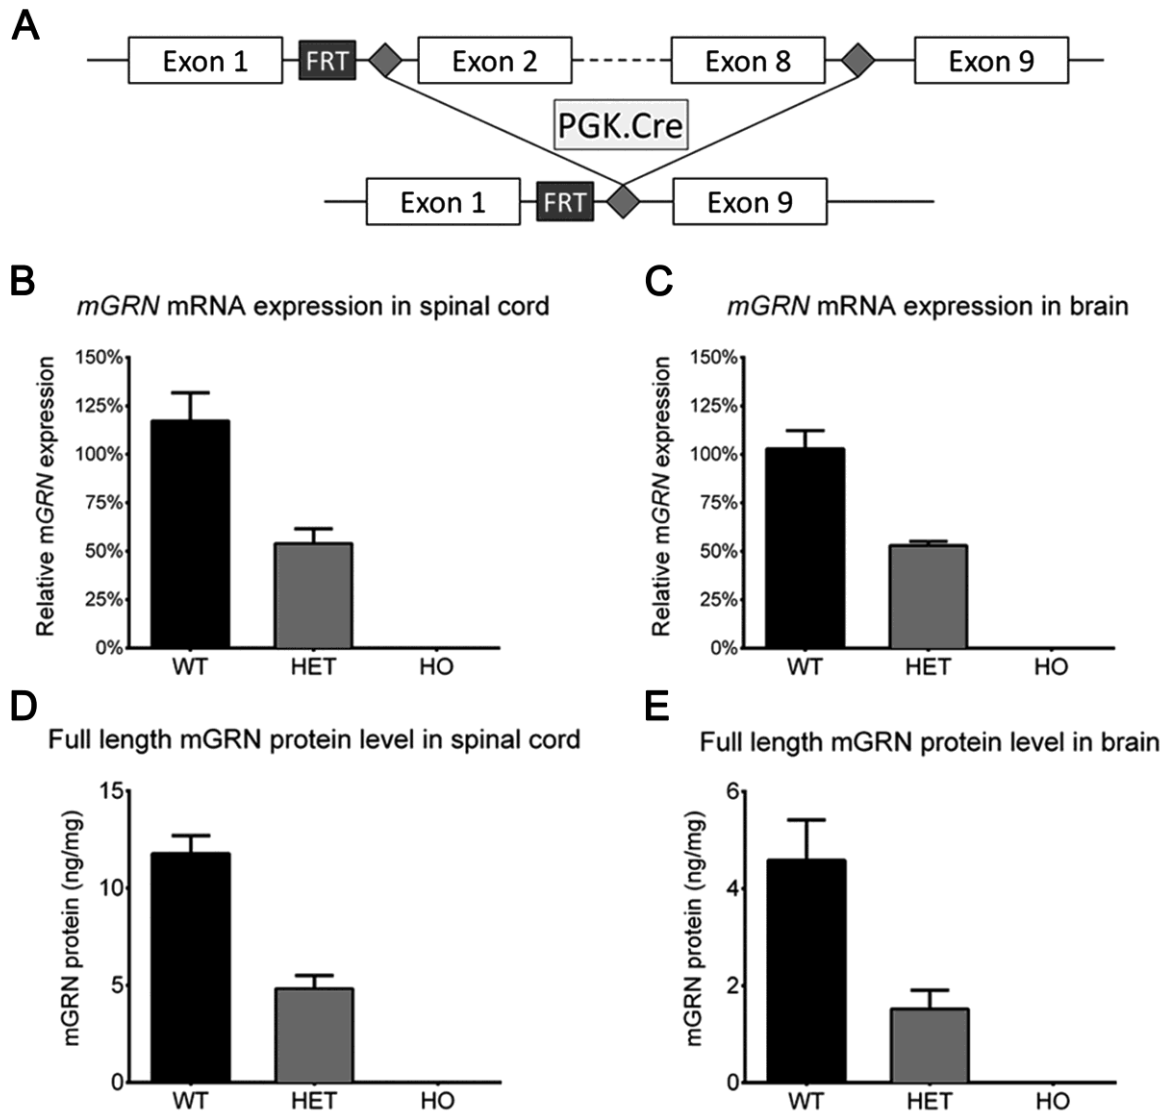

**Figure S1: Characterization of the *mGRN* knockout mice.** (A) Schematic representation of the genetic modifications that led to a constitutive *progranulin* knockout, before and after crossing with a PGK-1 Cre line. (B – E) *mGRN* mRNA and protein level were analyzed by qPCR and ELISA, in brains and spinal cords of constitutive *mGRN*<sup>-/-</sup> mice.

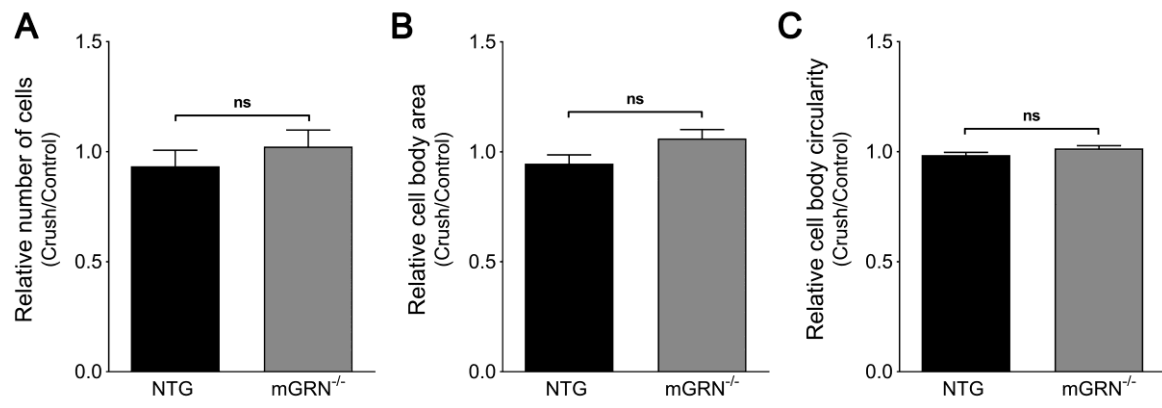

**Figure S2: Analysis of cell bodies in the facial motor nucleus at 28 days post injury in 7 week old mice.** The number (A), area (B) and circularity (C) of facial motor neuron cell bodies in the facial motor nucleus, normalized to the contralateral side.

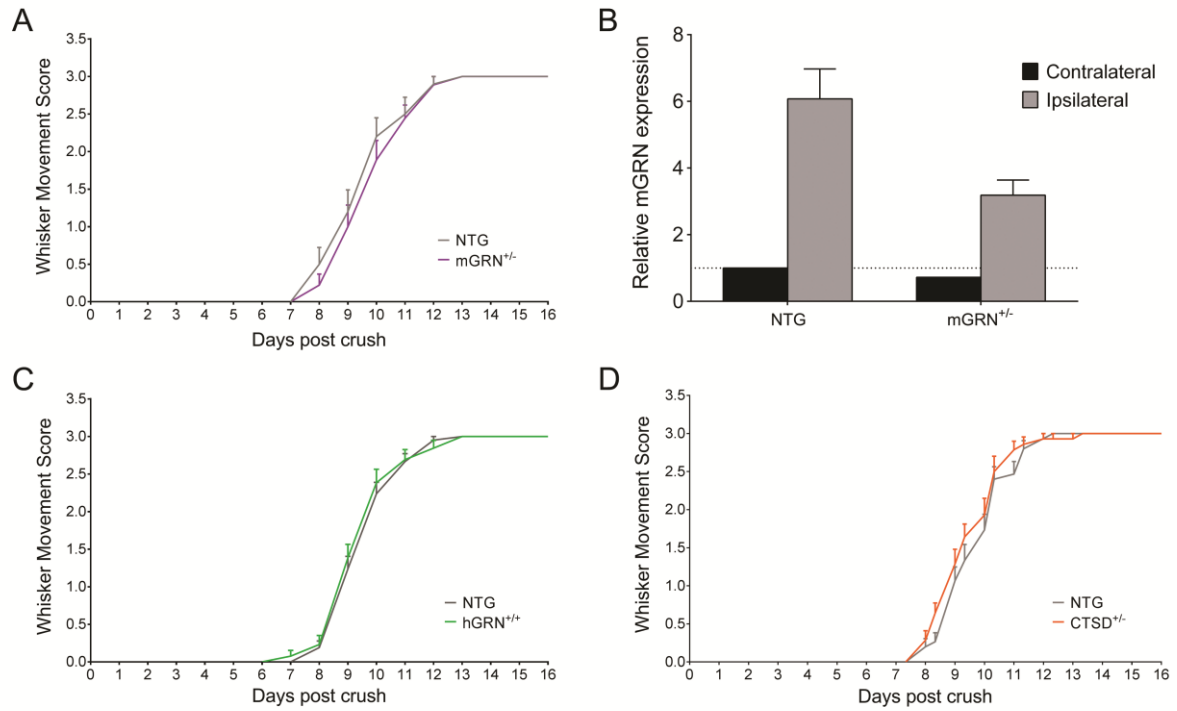

**Figure S3: Whisker movement recovery in mGRN<sup>+/-</sup>, hGRN<sup>+/+</sup> and CTSD<sup>+/-</sup> mice.** (A) Whisker movement recovery was unchanged in heterozygous mGRN knockout mice. (B) Quantification of the transcriptional mGRN upregulation in the facial nerve, at 5 days post crush. (C) Genetic overexpression of human GRN has no effect on whisker movement recovery. (D) Heterozygous CTSD knockout mice show no delay in whisker movement recovery.

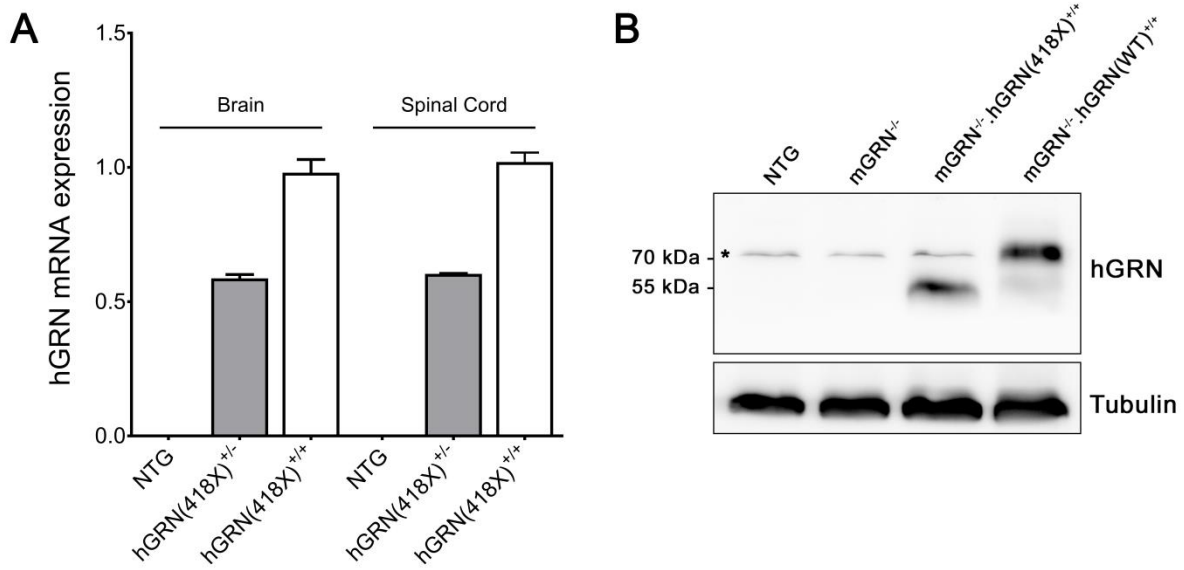

**Figure S4: RNA and protein expression of hGRN(418X).** (A) Relative levels of hGRN mRNA expression in the brain and spinal cord of hGRN(418X) overexpressing mice. (B) Western blot showing expression of the 418X truncated as well as the wild-type hGRN protein in a mGRN knockout background, *asterisk* indicates a non-specific band.
